# Supplementary material for: New 8-hydroxy quinoline-polycyclic aromatic hydrocarbon (PAH) conjugates and their sulfonated derivatives: effects of sulfonation and PAH size on their structural, supramolecular and cytotoxic properties
Source: Royal Society of Chemistry journal article supplement (doi:10.1039/d4ce00105b), 2024-01-01
Supplement: d4ce00105b1.pdf [file d4ce00105b1.pdf]

## Electronic Supplementary Information

### New 8-Hydroxy Quinoline-Polycyclic Aromatic Hydrocarbon (PAH) Conjugates and Their Sulfonated Derivatives: Effects of Sulfonation and PAH Size on Their Structural, Supramolecular and Cytotoxic Properties

Suman Sehlangia,<sup>a</sup> Surbhi Dogra,<sup>b</sup> Prosenjit Mondal,<sup>b</sup> Chullikkattil P. Pradeep\*<sup>a</sup>

<sup>a</sup>School of Chemical Sciences, Indian Institute of Technology Mandi, Mandi, Himachal Pradesh – 175005, India. Email: pradeep@iitmandi.ac.in; Fax: +911905 267 009; Tel: +91 1905 267 045.

<sup>b</sup>School of Biosciences and Bioengineering, Indian Institute of Technology Mandi, Mandi, Himachal Pradesh – 175005, India.

| S. No. | Details                                                         | Caption  | Page No. |
|--------|-----------------------------------------------------------------|----------|----------|
| 1      | Experimental Section                                            | Scheme 1 | S3–S6    |
| 2      | <sup>1</sup> H NMR and <sup>13</sup> C NMR spectrum of PH1      | S1–S2    | S7       |
| 3      | HR-MS of PH1 and <sup>1</sup> H NMR of PH2                      | S3–S4    | S8       |
| 4      | <sup>13</sup> C NMR spectrum and HR-MS of PH2                   | S5–S6    | S9       |
| 5      | <sup>1</sup> H NMR and <sup>13</sup> C NMR spectrum of PH3      | S7–S8    | S10      |
| 6      | HR-MS of PH3 and <sup>1</sup> H NMR spectrum of PD1             | S9–S10   | S11      |
| 7      | <sup>13</sup> C NMR spectrum and HR-MS of PD1                   | S11–S12  | S12      |
| 8      | <sup>1</sup> H NMR and <sup>13</sup> C NMR spectrum of PD2      | S13–S14  | S13      |
| 9      | HR-MS of PD2 and <sup>1</sup> H NMR spectrum of PD3             | S15–S16  | S14      |
| 10     | <sup>13</sup> C NMR spectrum and HR-MS of PD3                   | S17–S18  | S15      |
| 11     | Crystal and structure refinement data for PH1, PH2, and PD1-PD3 | Table S1 | S16      |
| 12     | Details of weak bonding interactions in PH1 and PH3             | Table S2 | S17      |
| 13     | Unit cell of PH3                                                | S19      | S18      |

|    |                                                                                                                      |          |          |
|----|----------------------------------------------------------------------------------------------------------------------|----------|----------|
| 14 | Analyses of possible C–H··· $\pi$ interactions in PH1 and PH3                                                        | Table S3 | S19      |
| 15 | Details of weak bonding interactions in PD1-PD3                                                                      | Table S4 | S20      |
| 16 | The extension of 1D chains into 2D sheets through $\pi$ - $\pi$ stacking and C–H···O interactions in PD3.            | S20      | S21      |
| 17 | Analyses of possible $\pi$ - $\pi$ interactions in PD2 and PD3                                                       | Table S5 | S22, S23 |
| 18 | Analyses of possible C–H··· $\pi$ interactions in PD1-PD3                                                            | Table S6 | S23      |
| 19 | Growth inhibitory response of PD1-PD3                                                                                | S21      | S24      |
| 20 | A comparison of cytotoxic properties of PH and PD series compounds with similar reported compounds in the literature | Table S7 | S24,S25  |
| 21 | References                                                                                                           |          | S26      |

## Experimental Section

**Materials and Instrumentation:** All the chemicals were purchased from Sigma Aldrich. Solvents used were of spectroscopic grade and were used without further treatment.  $^1\text{H}$  and  $^{13}\text{C}$  NMR spectra were recorded on a Jeol-JNM 500 MHz NMR spectrometer using  $\text{DMSO-}d_6$  and  $\text{CDCl}_3$  as solvents and TMS as internal standard. HR-MS data were recorded on Bruker HD compact instrument.

**Single Crystal X-ray Diffraction Analysis:** Single-crystal X-ray data were collected on an Agilent SuperNova diffractometer, equipped with a multilayer optics monochromated dual source (Cu and Mo) and an Eos CCD detector, using Cu-K $\alpha$  radiation (1.54184 Å) at room temperature. Data acquisition, reduction, and absorption correction were performed by using CrysAlisPRO.<sup>[1]</sup> The structure was solved with ShelXS<sup>[2]</sup> program using direct methods and refined on  $F^2$  by full-matrix least-squares techniques with ShelXL<sup>[2]</sup> through the Olex<sup>2</sup> (v.1.2) program package.<sup>[3]</sup> Anisotropic displacement parameters were applied for all the atoms except for hydrogen atoms. The hydrogen atoms were placed in calculated positions and refined as riding atoms using isotropic displacement parameters. CCDC Nos: 2325794 - 2325798 contain supplementary crystallographic data.

**Cell Viability Assay:** The viability of HepG2 cells under drug treatment was determined using MTT assay. Briefly, HepG2 cells were seeded at a density of  $9 \times 10^3$  cells per well of a 96 well plate. The following day, cells were treated with samples, concentrations ranging from 0.5-100  $\mu\text{g/ml}$  of different compounds for 24 hours. After the treatment, cells were incubated with 0.5mg/ml 3-(4,5-dimethylthiazol2-yl)-2,5-diphenyltetrazolium bromide (MTT) at 37°C for 4 hours. The media was removed, and the formazan crystals formed were dissolved in DMSO. Absorbance was measured at 570 nm using iTecan microplate reader. The  $\text{IC}_{50}$  values were calculated using GraphPad Prism 8 software.

**Synthesis of PH and PD Series Compounds:** The target PH and PD series compounds were synthesized starting from 4-substituted phenol *via* a reported procedure, as shown in Scheme S1.

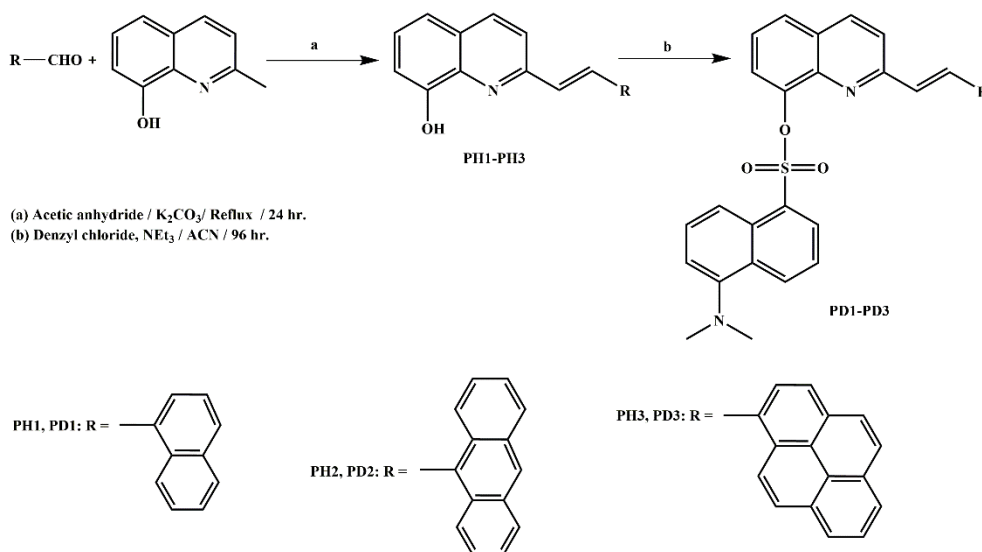

**Scheme S1.** Overall synthetic scheme of compounds PH1-PH3 and PD1-PD3.

**General Procedure for the Synthesis of PH1-PH3:** A mixture of corresponding aldehyde (1 mmol), 2-methyl-8-hydroxyquinoline (1 mmol), and acetic anhydride was heated at 130° C under a nitrogen atmosphere for 24 h (TLC monitoring). After that, the reaction was quenched by pouring into an ice-water mixture with stirring. Thus, the separated crude compound was filtered, dried, and purified by recrystallization from ethyl acetate following a reported procedure.<sup>[4]</sup> To the product was added methanol and  $K_2CO_3$  (1.5 mmol), and the reaction mixture was stirred at room temperature for 120 min. After completing the reaction, as monitored by TLC, the reaction mixture was poured into water and neutralized with HCl solution, and the precipitate was filtered and dried. The crude product thus obtained was purified by recrystallization from ethanol.

**PH1** was obtained as dark brown solid. Yield: 0.89 mmol (89%). Melting point: 134 °C.  $^1H$  NMR (500 MHz,  $CDCl_3$ )  $\delta$  ppm: 8.46 (d,  $J = 15.8$  Hz, 1H), 8.24 (d,  $J = 8.95$  Hz, 1H), 8.08 (d,  $J = 8.25$  Hz, 1H), 7.79-7.84 (m, 3H), 7.64 (d,  $J = 8.9$  Hz, 1H), 7.51-7.54 (m, 1H), 7.45-7.48 (m, 2H), 7.32-7.36 (m, 2H), 7.24-7.26 (m, 1H), 7.12 (d,  $J = 7.6$  Hz, 1H).  $^{13}C$  NMR (125 MHz)  $\delta$  ppm: 153.6, 152.0, 138.0, 136.5, 133.9, 133.7, 131.4, 131.3, 130.8, 129.1, 128.7, 127.5, 127.4, 126.4, 126.0, 125.6, 124.2, 123.6, 120.6, 117.7, 110.2. HRMS:  $m/z$  calculated for  $C_{21}H_{15}ON$   $[M+H]^+ = 298.1154$ ; found = 298.1203.

**PH2** was obtained as a yellow solid. Yield: 0.86 mmol (86%). Melting point: 202 °C. <sup>1</sup>H NMR (500 MHz, DMSO-*d*<sub>6</sub>) δ ppm: 9.07 (d, *J* = 16.5 Hz, 1H), 8.62 (s, 1H), 8.46 (d, *J* = 8.95 Hz, 2H), 8.37 (d, *J* = 8.25 Hz, 1H), 8.13-8.15 (m, 2H), 7.98 (d, *J* = 8.95 Hz, 1H), 7.54-60(m, 4H), 7.40-7.45(m, 2H), 7.26 (d, *J* = 15.8 Hz, 1H), 7.14 (dd, *J* = 8.9 Hz, 1H), <sup>13</sup>C NMR (125 MHz) δ ppm: 153.4, 153.0, 138.3, 136.8, 136.7, 132.0, 131.1, 130.7, 129.1, 128.8, 128.0, 127.4, 126.9, 126.1, 125.8, 125.5, 121.2, 117.5, 111.4. HRMS: *m/z* calculated for C<sub>25</sub>H<sub>14</sub>ON [M+H]<sup>+</sup> = 348.1310; found = 348.1065.

**PH3** was obtained as a yellow solid. Yield: 0.82 mmol (82%). Melting point: 169 °C. <sup>1</sup>H NMR (500 MHz, DMSO-*d*<sub>6</sub>) δ ppm: 9.28 (d, *J* = 15.8 Hz, 1H), 9.00 (d, *J* = 8.95 Hz, 1H), 8.64 (d, *J* = 8.25 Hz, 1H), 8.32-8.37 (m, 5H), 8.22 (s, 2H), 8.09 (m, 1H), 7.97 (d, *J* = 8.25 Hz, 1H), 7.81 (d, *J* = 15.8 Hz, 1H), 7.36-7.43 (m, 2H), 7.13 (d, *J* = 6.9 Hz, 1H). <sup>13</sup>C NMR (125 MHz) δ ppm: 153.6, 153.4, 138.5, 136.6, 131.0, 130.9, 130.5, 130.3, 128.6, 127.9, 127.8, 127.7, 127.4, 127.3, 126.5, 125.6, 125.4, 125.4, 124.3, 124.0, 123.7, 121.8, 117.2, 111.4. HRMS: *m/z* calculated for C<sub>27</sub>H<sub>17</sub>ON [M+H]<sup>+</sup> = 372.1310; found = 372.1750.

**General Procedure for the Synthesis of PD1-PD3:** Compound PH1/PH2/PH3 (1 eq.; 2 mmol) was dissolved in acetonitrile (ACN) with continuous stirring followed by the addition of the base triethylamine (NEt<sub>3</sub>) (1.2 eq.). The reaction mixture was stirred for 20 minutes. Dansyl chloride (1.5 eq., 3 mmol) was added under N<sub>2</sub> atmosphere with vigorous stirring to the reaction mixture and kept at room temperature for 96 hours. A yellow precipitate was formed, which was filtered and extracted with chloroform. The organic layer was collected and evaporated. The crude product thus obtained was purified by recrystallization from ethanol.<sup>[5]</sup>

**PD1** was obtained as light yellow solid. Yield: 1.76 mmol (88%). Melting point: 178 °C. <sup>1</sup>H NMR (500 MHz, DMSO-*d*<sub>6</sub>) δ ppm: 8.58 (d, *J* = 8.95 Hz, 1H), 8.42 (d, *J* = 8.95 Hz, 1H), 8.32-8.38 (m, 3H), 8.08 (d, *J* = 8.95 Hz, 1H), 7.99-8.02 (m, 3H), 7.92 (dd, *J* = 9.6 Hz, 1H), 7.68-7.76 (m, 3H), 7.56-7.62 (m, 4H), 7.45-7.48 (m, 1H), 7.13 (d, *J* = 6.9 Hz, 1H), 6.42 (d, *J* = 16.5 Hz, 1H), 2.54 (s, 6H). <sup>13</sup>C NMR (125 MHz) δ ppm: 156.6, 151.7, 145.4, 141.0, 136.8, 134.0, 133.5, 132.5, 132.1, 131.9, 131.5, 131.4, 130.8, 130.6, 129.7, 129.4, 129.1, 128.8, 127.8, 127.1, 126.7, 126.4, 126.4, 124.6, 124.2, 124.0, 123.8, 120.6, 120.0, 115.8, 45.2. HRMS: *m/z* calculated for C<sub>33</sub>H<sub>26</sub>O<sub>3</sub>N<sub>2</sub>S [M+H]<sup>+</sup> = 531.1664; found 531.2079.

**PD2** was obtained as yellow solid. Yield: 1.66 mmol (83%). Melting point: 160 °C. <sup>1</sup>H NMR (500 MHz, DMSO-*d*<sub>6</sub>) δ ppm: 8.64 (s, 1H), 8.50 (d, *J* = 8.95 Hz, 1H), 8.39 (d, *J* = 8.25 Hz, 1H), 8.28 (d, *J* = 16.5 Hz, 1H), 8.09-8.18 (m, 6H), 8.00 (d, *J* = 7.55 Hz, 1H), 7.95 (d, *J* = 7.55 Hz, 1H), 7.70 (d, *J* = 7.55 Hz, 1H), 7.56-7.63 (m, 5H), 7.46 (d, *J* = 16.5 Hz, 1H), 7.35 (d, *J* = 15.8 Hz, 1H), 6.44 (d, *J* = 7.55 Hz, 1H), 6.11 (d, *J* = 8.95 Hz, 1H), 2.07 (s, 6H). <sup>13</sup>C NMR (125 MHz) δ ppm: 155.6, 150.9, 145.0, 140.4, 136.8, 136.5, 132.1, 131.4, 131.3, 131.2, 131.1, 129.8, 128.9, 128.7, 128.6, 128.5, 127.3, 127.1, 126.1, 125.6, 125.5, 123.8, 123.1, 120.2, 119.3, 114.7, 44.1. HRMS: *m/z* calculated for C<sub>37</sub>H<sub>28</sub>O<sub>3</sub>N<sub>2</sub>S [M+H]<sup>+</sup> = 581.1821; found 581.1706.

**PD3** was obtained as yellow solid. Yield: 1.62 mmol (81%). Melting point: 204 °C. <sup>1</sup>H NMR (500 MHz, DMSO-*d*<sub>6</sub>) δ ppm: 8.68-8.74 (m, 2H), 8.62 (d, *J* = 8.95 Hz, 1H), 8.44-8.48 (m, 2H), 8.34-8.38 (m, 4H), 8.25-8.32 (m, 3H), 8.18 (d, *J* = 8.9 Hz, 1H), 8.10-8.13 (m, 1H), 8.04 (d, *J* = 7.55 Hz, 1H), 7.94 (d, *J* = 9.65 Hz, 1H), 7.78-7.81 (m, 1H), 7.56-7.62 (m, 2H), 7.48-7.51 (m, 1H), 7.18 (d, *J* = 6.9 Hz, 1H), 6.72 (d, *J* = 15.8 Hz, 1H), 2.52 (s, 6H). <sup>13</sup>C NMR (125 MHz) δ ppm: 156.2, 151.2, 144.8, 140.6, 136.3, 131.8, 131.6, 131.2, 131.0, 130.4, 130.3, 130.1, 128.6, 128.5, 128.3, 128.0, 127.9, 127.5, 127.2, 126.6, 125.9, 125.8, 125.5, 125.4, 124.2, 124.0, 124.0, 123.4, 123.3, 123.1, 120.3, 119.5, 115.4, 44.6. HRMS: *m/z* calculated for C<sub>39</sub>H<sub>28</sub>O<sub>3</sub>N<sub>2</sub>S [M+H]<sup>+</sup> = 605.1821; found 605.1729.

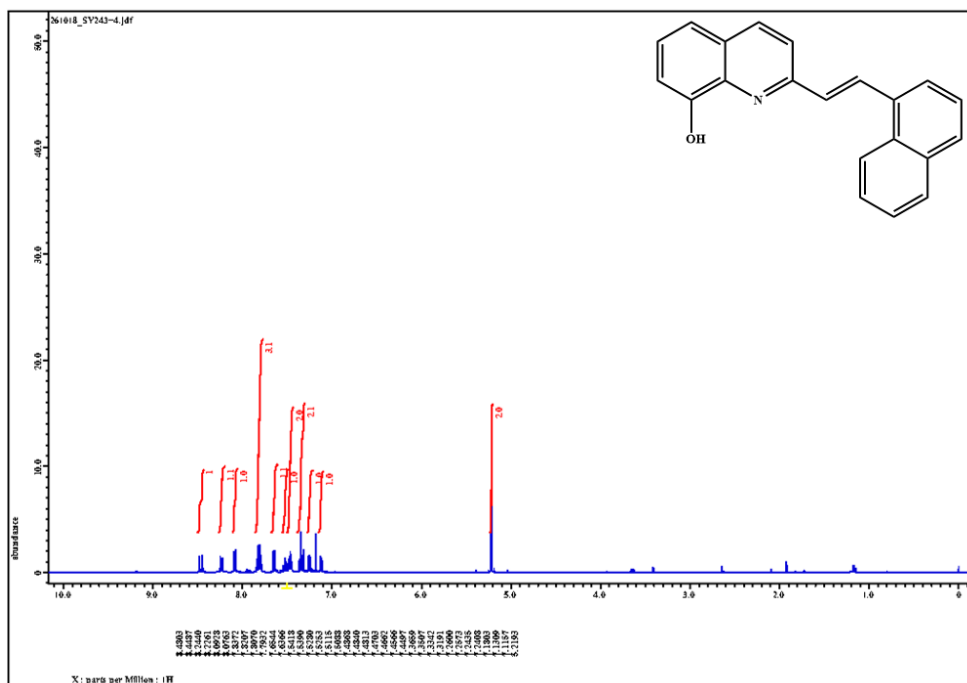

**Fig. S1** <sup>1</sup>H NMR spectrum of PH1.

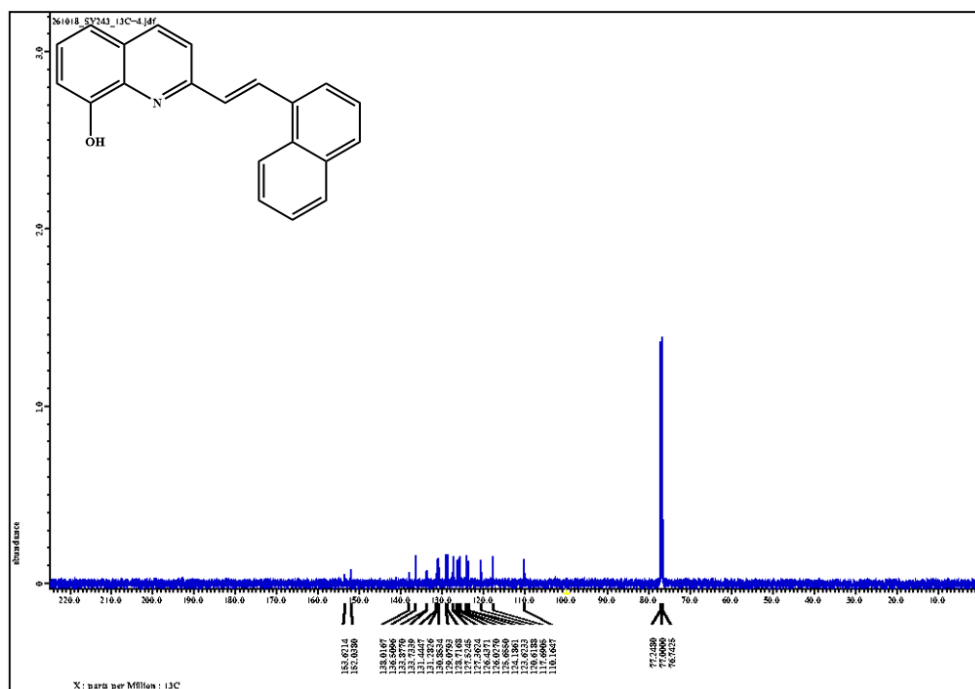

**Fig. S2** <sup>13</sup>C NMR spectrum of PH1.





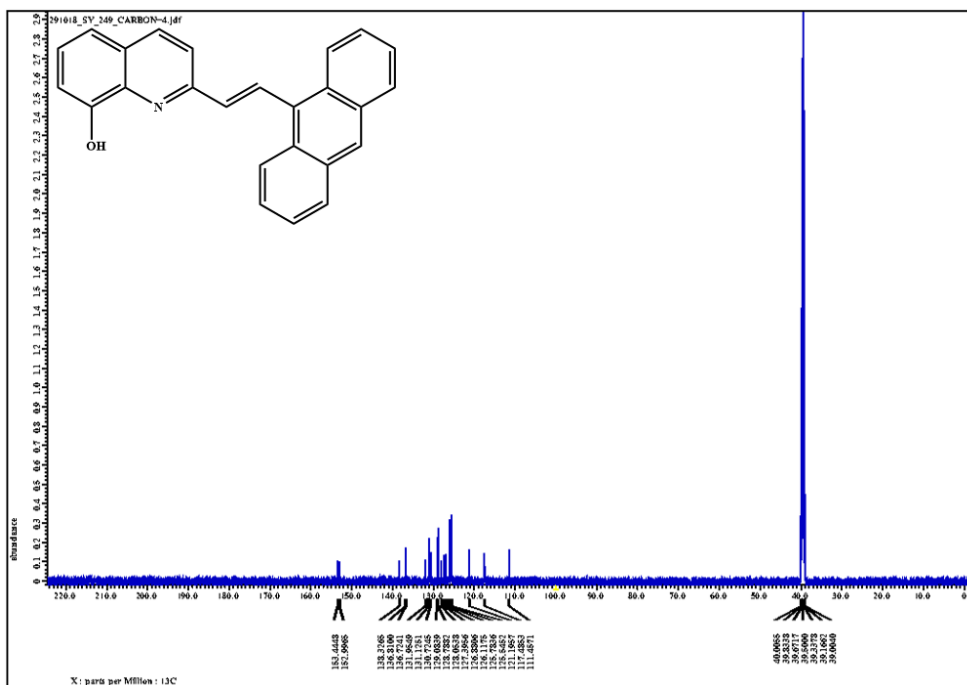

Fig. S5  $^{13}\text{C}$  NMR spectrum of PH2.

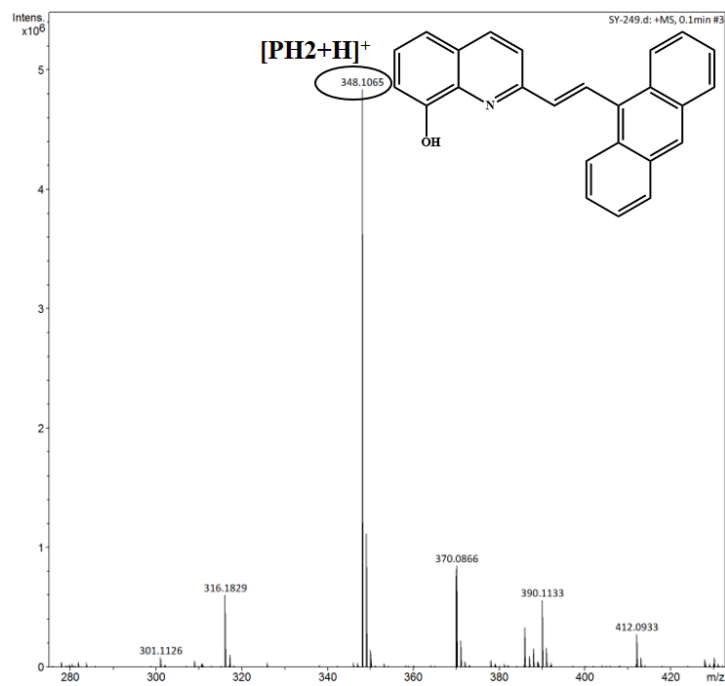

Fig. S6 HR-MS of PH2.

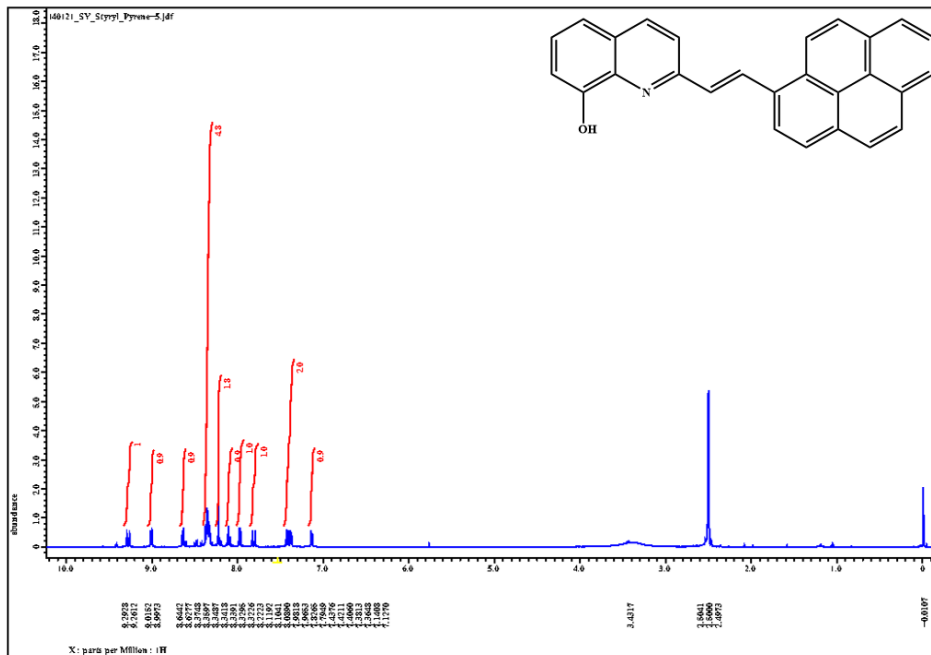

Fig. S7 <sup>1</sup>H NMR spectrum of PH3.

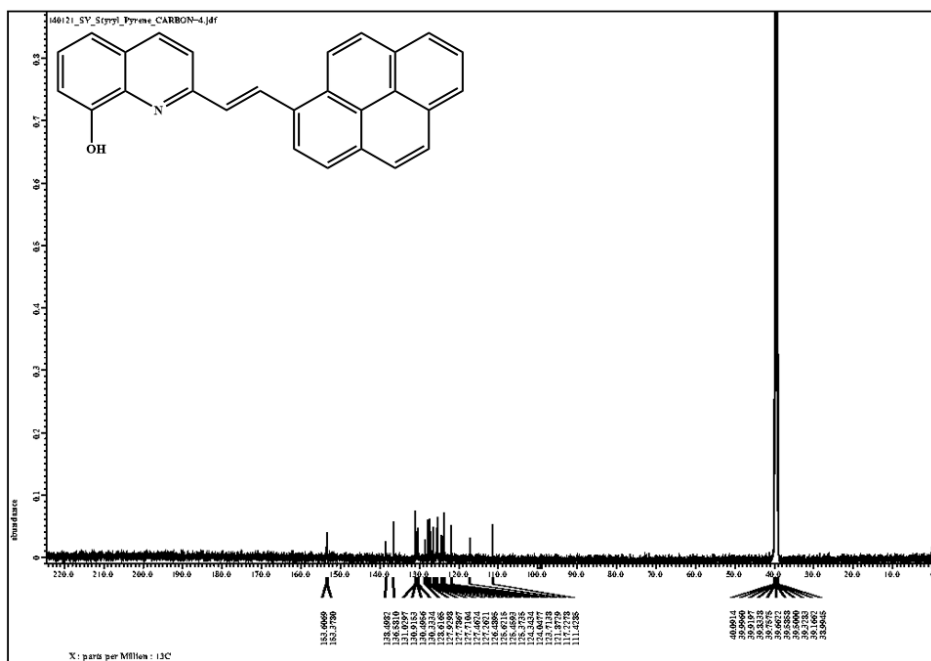

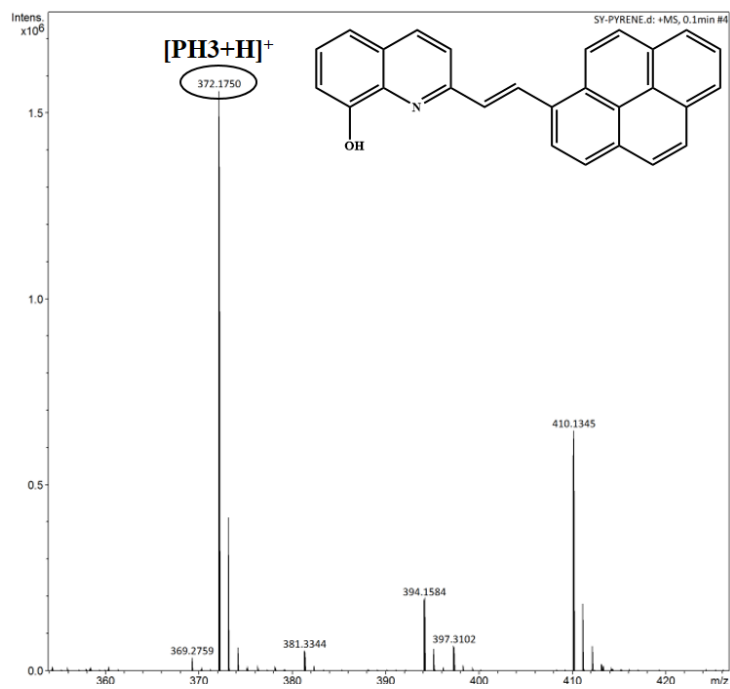

**Fig. S9** HR-MS spectrum of PH3.

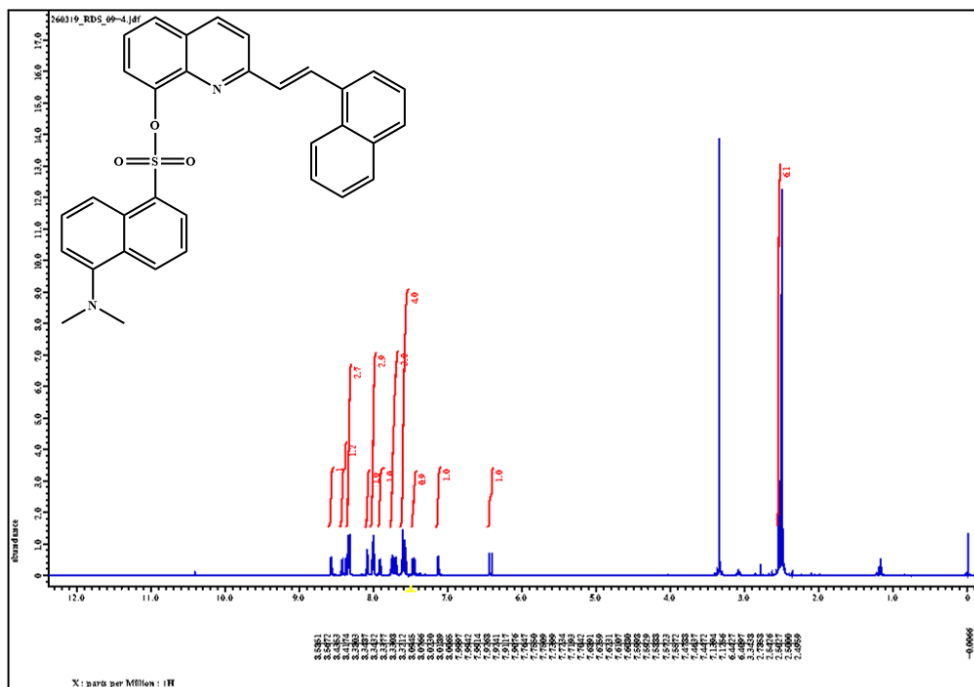

**Fig. S10** <sup>1</sup>H NMR spectrum of PD1.







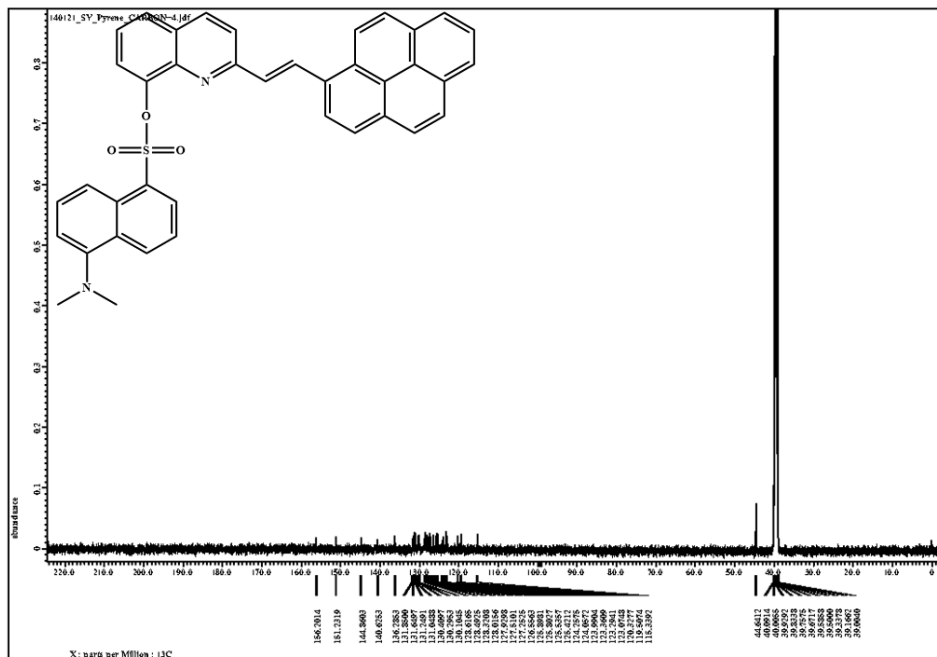

Fig. S17 <sup>13</sup>C NMR spectrum of PD3.

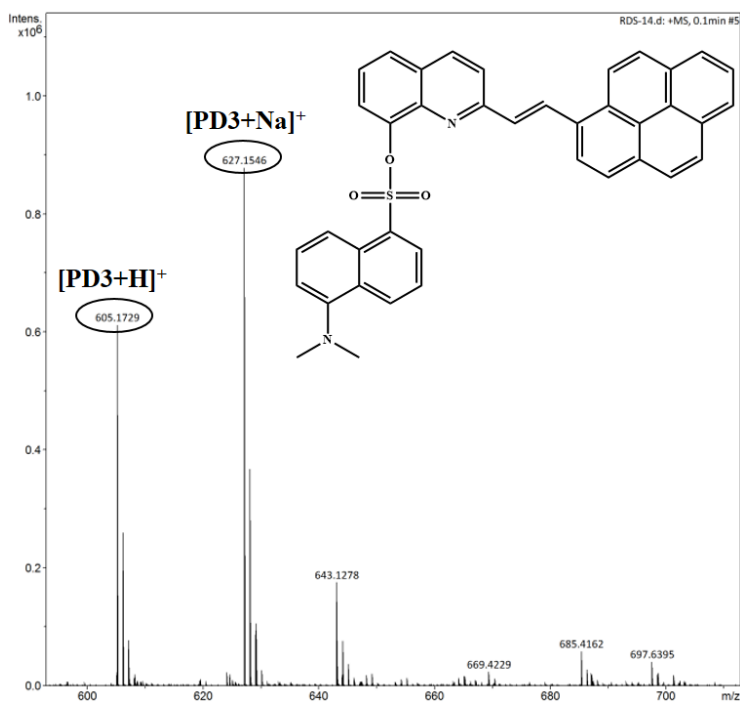

Fig. S18 HR-MS of PD3.

## Crystal Structure Analyses of PH & PD Series Compounds

**Table S1.** Crystal and structure refinement data for PH1, PH3, and PD1-PD3.

|                               | PH1                                                           | PH3                                                           | PD1                                                             | PD2                                                             | PD3                                                             |
|-------------------------------|---------------------------------------------------------------|---------------------------------------------------------------|-----------------------------------------------------------------|-----------------------------------------------------------------|-----------------------------------------------------------------|
| Crystallization solvents      | Methanol & dichloromethane                                    | Methanol & dichloromethane                                    | Methanol & dichloromethane                                      | Methanol & dichloromethane                                      | Methanol & dichloromethane                                      |
| Empirical formula             | C <sub>21</sub> H <sub>15</sub> NO                            | C <sub>27</sub> H <sub>17</sub> NO                            | C <sub>33</sub> H <sub>26</sub> N <sub>2</sub> O <sub>3</sub> S | C <sub>37</sub> H <sub>28</sub> N <sub>2</sub> O <sub>3</sub> S | C <sub>39</sub> H <sub>28</sub> N <sub>2</sub> O <sub>3</sub> S |
| Formula weight                | 297.359                                                       | 371.442                                                       | 530.65                                                          | 580.712                                                         | 604.73                                                          |
| Crystal system                | Orthorhombic                                                  | Monoclinic                                                    | Monoclinic                                                      | Triclinic                                                       | Triclinic                                                       |
| Space group                   | <i>Pca2<sub>1</sub></i>                                       | <i>P2<sub>1</sub>/n</i>                                       | <i>P2<sub>1</sub>/n</i>                                         | <i>P-1</i>                                                      | <i>P-1</i>                                                      |
| <i>a</i> (Å)                  | 15.9480(6)                                                    | 15.5838(15)                                                   | 7.4377(3)                                                       | 10.5913(7)                                                      | 8.0458(5)                                                       |
| <i>b</i> (Å)                  | 6.6074(3)                                                     | 6.6875(6)                                                     | 14.7657(4)                                                      | 11.8069(7)                                                      | 13.1703(9)                                                      |
| <i>c</i> (Å)                  | 14.6479(6)                                                    | 18.8389(19)                                                   | 23.7592(7)                                                      | 12.2854(7)                                                      | 14.8309(13)                                                     |
| <i>α</i> (°)                  | 90.00                                                         | 90                                                            | 90.00                                                           | 103.279(5)                                                      | 74.204(7)                                                       |
| <i>β</i> (°)                  | 90.00                                                         | 107.494(11)                                                   | 93.154(3)                                                       | 103.085(5)                                                      | 74.975(6)                                                       |
| <i>γ</i> (°)                  | 90.00                                                         | 90                                                            | 90.00                                                           | 96.474(5)                                                       | 86.981(5)                                                       |
| <i>V</i> (Å <sup>3</sup> )    | 1543.52(11)                                                   | 1872.5(3)                                                     | 2605.36(14)                                                     | 1434.23(16)                                                     | 1460.25(18)                                                     |
| <i>Z</i>                      | 4                                                             | 4                                                             | 4                                                               | 2                                                               | 2                                                               |
| <i>ρ</i> (g/cm <sup>3</sup> ) | 1.280                                                         | 1.318                                                         | 1.353                                                           | 1.345                                                           | 1.375                                                           |
| <i>μ</i> (mm <sup>-1</sup> )  | 0.079                                                         | 0.623                                                         | 1.414                                                           | 1.335                                                           | 1.336                                                           |
| <i>F</i> (000)                | 624.0                                                         | 778.3                                                         | 1268.0                                                          | 610.0                                                           | 722.0                                                           |
| <i>T</i>                      | N/A                                                           | N/A                                                           | N/A                                                             | N/A                                                             | N/A                                                             |
| Reflections collected         | 3419                                                          | 5854                                                          | 8875                                                            | 8716                                                            | 8600                                                            |
| Independent reflections       | 2471 [R <sub>int</sub> = 0.0231, R <sub>sigma</sub> = 0.0390] | 3275 [R <sub>int</sub> = 0.0200, R <sub>sigma</sub> = 0.0277] | 4575 [R <sub>int</sub> = 0.0194]                                | 5036 [R <sub>int</sub> = 0.0248, R <sub>sigma</sub> = 0.0327]   | 4393 [R <sub>int</sub> = 0.0602]                                |
| Data/restraints/parameters    | 2471/1/209                                                    | 3275/0/263                                                    | 4575/0/354                                                      | 5036/0/390                                                      | 4393/0/407                                                      |
| Final R indices [I>2sigma(I)] | R <sub>1</sub> = 0.0480, wR <sub>2</sub> = 0.1070             | R <sub>1</sub> = 0.0432, wR <sub>2</sub> = 0.1143             | R <sub>1</sub> = 0.0403, wR <sub>2</sub> = 0.1101               | R <sub>1</sub> = 0.0415, wR <sub>2</sub> = 0.1079               | R <sub>1</sub> = 0.0554, wR <sub>2</sub> = N/A                  |
| R indices (all data)          | R <sub>1</sub> = 0.0623, wR <sub>2</sub> = 0.1198             | R <sub>1</sub> = 0.0631, wR <sub>2</sub> = 0.1357             | R <sub>1</sub> = 0.0513, wR <sub>2</sub> = N/A                  | R <sub>1</sub> = 0.0521, wR <sub>2</sub> = 0.1172               | R <sub>1</sub> = 0.0740, wR <sub>2</sub> = 0.1360               |
| GOF                           | 1.090                                                         | 1.049                                                         | 1.080                                                           | 1.058                                                           | 0.979                                                           |

$R_1 = F_o - F_c / F_o$ ,  $wR_2 = [w(F_o^2 - F_c^2)^2 / w(F_o)^2]^{1/2}$ .



**Table S2.** Details of the weak bonding interactions in PH1 and PH3.

| D                                                                                                                                  | H   | A               | d(D-H)/Å | d(H-A)/Å | d(D-A)/Å | D-H-A/°    |
|------------------------------------------------------------------------------------------------------------------------------------|-----|-----------------|----------|----------|----------|------------|
| <b>PH1</b>                                                                                                                         |     |                 |          |          |          |            |
| C2                                                                                                                                 | H2  | O1 <sup>1</sup> | 0.9300   | 2.802(4) | 3.609(4) | 145.67(8)  |
| C11                                                                                                                                | H11 | O1 <sup>1</sup> | 0.9300   | 2.545(4) | 3.318(4) | 140.79(9)  |
| C20                                                                                                                                | H20 | O1 <sup>1</sup> | 0.9300   | 2.808(4) | 3.459(4) | 128.03(9)  |
| C5                                                                                                                                 | H5  | N1 <sup>2</sup> | 0.9300   | 3.189(4) | 3.762(4) | 121.69(8)  |
| C17                                                                                                                                | H17 | O1 <sup>3</sup> | 0.9300   | 2.817(4) | 3.620(5) | 145.29(12) |
| C17                                                                                                                                | H17 | N1 <sup>3</sup> | 0.9300   | 3.247(5) | 3.804(5) | 120.41(9)  |
| Symmetry codes: <sup>1</sup> 3/2-X,+Y,-1/2+Z; <sup>2</sup> +X,-1+Y,+Z; <sup>3</sup> 1-X,2-Y,-1/2+Z                                 |     |                 |          |          |          |            |
| <b>PH3</b>                                                                                                                         |     |                 |          |          |          |            |
| C23                                                                                                                                | H23 | O1 <sup>1</sup> | 0.9300   | 2.940(3) | 3.585(3) | 127.64(5)  |
| C21                                                                                                                                | H21 | O1 <sup>2</sup> | 0.9300   | 2.625(3) | 3.348(3) | 135.07(7)  |
| C17                                                                                                                                | H17 | O1 <sup>3</sup> | 0.9300   | 3.057(3) | 3.780(3) | 135.84(6)  |
| C5                                                                                                                                 | H5  | N1 <sup>4</sup> | 0.9300   | 2.996(3) | 3.616(3) | 125.42(6)  |
| C16                                                                                                                                | H16 | O1 <sup>3</sup> | 0.9300   | 3.389(3) | 3.946(3) | 120.77(5)  |
| C6                                                                                                                                 | H6  | O1 <sup>4</sup> | 0.9300   | 2.977(3) | 3.585(3) | 124.41(5)  |
| Symmetry codes: <sup>1</sup> 1/2-X,1/2+Y,1/2-Z; <sup>2</sup> 1/2+X,3/2-Y,-1/2+Z; <sup>3</sup> 1-X,2-Y,1-Z; <sup>4</sup> +X,-1+Y,+Z |     |                 |          |          |          |            |

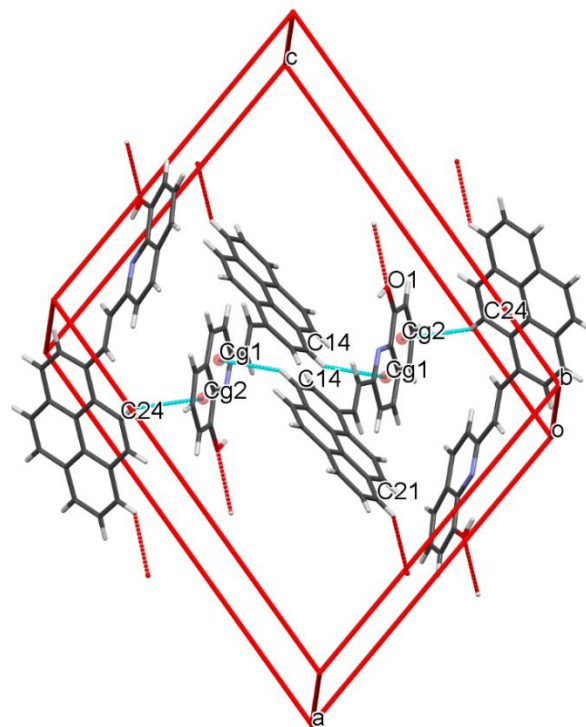

**Fig. S19** Unit cell of PH3. Each molecule is part of supramolecular infinite 1D chains formed by C–H···O interactions, shown as hanging contacts in red. The interconnection of molecules through certain C–H··· $\pi$  interactions are also shown.

### Analysis of Supramolecular C–H··· $\pi$ Interactions in PH series Compounds.<sup>6</sup>

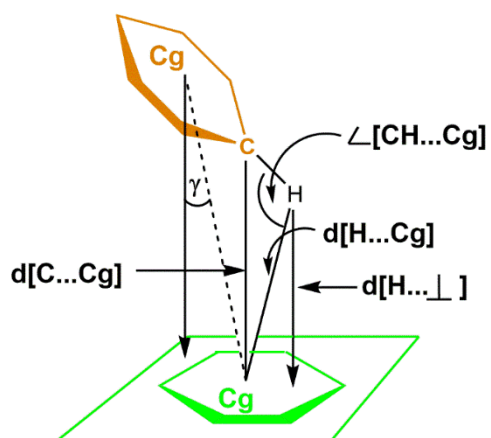

**Scheme S2.** Graphical presentation of the parameters used for the description of C–H··· $\pi$  stacking interactions in the present study. See Reference 6 for details.

**Table S3.** Analyses of possible C–H··· $\pi$  interactions in PH1 and PH3.

| X–H(I)                                                                                                                                                                                                                                                                                                                                                                                                                                                                                          | Cg(J) | [ARU(J)] | H···Cg | H-Perp | $\gamma$ (°) | X–H···Cg | X···Cg    | X–H, $\pi$ |
|-------------------------------------------------------------------------------------------------------------------------------------------------------------------------------------------------------------------------------------------------------------------------------------------------------------------------------------------------------------------------------------------------------------------------------------------------------------------------------------------------|-------|----------|--------|--------|--------------|----------|-----------|------------|
| <b>PH1</b>                                                                                                                                                                                                                                                                                                                                                                                                                                                                                      |       |          |        |        |              |          |           |            |
| C5-H5[1]                                                                                                                                                                                                                                                                                                                                                                                                                                                                                        | Cg3   | 4565.01  | 2.65   | 2.63   | 5.68         | 133      | 3.3510(2) | 49         |
| C5-H5[1]                                                                                                                                                                                                                                                                                                                                                                                                                                                                                        | Cg6   | 4565.01  | 2.87   | -2.63  | 23.75        | 128      | 3.5211(2) | 49         |
| C7-H7[1]                                                                                                                                                                                                                                                                                                                                                                                                                                                                                        | Cg3   | 3565.01  | 2.98   | -2.92  | 11.34        | 152      | 3.8298(2) | 61         |
| C15-H15[1]                                                                                                                                                                                                                                                                                                                                                                                                                                                                                      | Cg1   | 4455.01  | 2.86   | 2.83   | 8.53         | 130      | 3.5308(2) | 48         |
| [4565] = 1/2+X,1-Y,Z; [3565] = 1/2-X,1+Y,1/2+Z; [4455] = -1/2+X,-Y,Z.                                                                                                                                                                                                                                                                                                                                                                                                                           |       |          |        |        |              |          |           |            |
| Where, CgX = Ring Center-of-Gravity of ring X. Ring 1 = N1-C1-C2-C3-C4-C9; Ring 3 = C12-C13-C14-C15-C16-C21; Ring 6 = C12-C13-C14-C15-C16-C17-C18-C19-C20-C21; see Figure 1 of main manuscript.                                                                                                                                                                                                                                                                                                 |       |          |        |        |              |          |           |            |
| <b>PH3</b>                                                                                                                                                                                                                                                                                                                                                                                                                                                                                      |       |          |        |        |              |          |           |            |
| C2-H2[1]                                                                                                                                                                                                                                                                                                                                                                                                                                                                                        | Cg9   | 1545.01  | 2.90   | 2.88   | 7.35         | 135      | 3.6232(4) | 39         |
| C2-H2[1]                                                                                                                                                                                                                                                                                                                                                                                                                                                                                        | Cg13  | 1545.01  | 2.97   | 2.88   | 14.19        | 140      | 3.7309(4) | 39         |
| C14-H14[1]                                                                                                                                                                                                                                                                                                                                                                                                                                                                                      | Cg1   | 3555.01  | 2.82   | -2.78  | 9.09         | 133      | 3.5131(4) | 39         |
| C14-H14[1]                                                                                                                                                                                                                                                                                                                                                                                                                                                                                      | Cg7   | 3555.01  | 2.85   | -2.76  | 14.34        | 127      | 3.4951(4) | 39         |
| C19-H19[1]                                                                                                                                                                                                                                                                                                                                                                                                                                                                                      | Cg5   | 2455.01  | 2.68   | -2.67  | 4.78         | 149      | 3.5150(4) | 58         |
| C19-H19[1]                                                                                                                                                                                                                                                                                                                                                                                                                                                                                      | Cg10  | 2455.01  | 2.84   | -2.67  | 20.09        | 137      | 3.5795(4) | 58         |
| C19-H19[1]                                                                                                                                                                                                                                                                                                                                                                                                                                                                                      | Cg12  | 2455.01  | 2.92   | -2.67  | 23.68        | 125      | 3.5372(4) | 59         |
| C19-H19[1]                                                                                                                                                                                                                                                                                                                                                                                                                                                                                      | Cg14  | 2455.01  | 2.94   | -2.67  | 24.87        | 126      | 3.5725(4) | 59         |
| C24-H24[1]                                                                                                                                                                                                                                                                                                                                                                                                                                                                                      | Cg2   | 2555.01  | 2.97   | 2.95   | 7.67         | 143      | 3.7548(4) | 48         |
| [1545] = X,-1+Y,Z; [3555] = -X,-Y,-Z; [2455] = -1/2-X,1/2+Y,1/2-Z; [2555] = 1/2-X,1/2+Y,1/2-Z.                                                                                                                                                                                                                                                                                                                                                                                                  |       |          |        |        |              |          |           |            |
| Where, CgX = Ring Center-of-Gravity of ring X. Ring 1 = N1-C1-C2-C3-C4-C9; Ring 2 = C4-C5-C6-C7-C8-C9; Ring 5 = C18-C19-C20-C21-C22-C27; Ring 7 = N1-C1-C2-C3-C4-C5-C6-C7-C8-C9; Ring 9 = C12-C13-C14-C15-C26-C27-C22-C23-C24-C25; Ring 10 = C15-C16-C17-C18-C19-C20-C21-C22-C27-C26; Ring 12 = C18-C19-C20-C21-C22-C23-C24-C25-C26-C27; Ring 13 = C12-C13-C14-C15-C16-C17-C18-C27-C22-C23-C24-C25; Ring 14 = C15-C16-C17-C18-C19-C20-C21-C22-C23-C24-C25-C26, see Figure 1 of main manuscript. |       |          |        |        |              |          |           |            |

**Table S4.** Details of weak bonding interactions in PD1-PD3.

| D                                                                                                                                                          | H    | A               | d(D-H)/Å | d(H-A)/Å  | d(D-A)/Å | D-H-A/°    |
|------------------------------------------------------------------------------------------------------------------------------------------------------------|------|-----------------|----------|-----------|----------|------------|
| <b>PD1</b>                                                                                                                                                 |      |                 |          |           |          |            |
| C28                                                                                                                                                        | H28  | O2 <sup>1</sup> | 0.9300   | 2.729(3)  | 3.630(3) | 163.47(6)  |
| C30                                                                                                                                                        | H30  | O2              | 0.9300   | 2.432(3)  | 3.030(3) | 122.07(6)  |
| C3                                                                                                                                                         | H3   | N2 <sup>2</sup> | 0.9300   | 2.938(3)  | 3.848(3) | 166.24(6)  |
| C6                                                                                                                                                         | H6   | O3 <sup>3</sup> | 0.9300   | 2.650(3)  | 3.384(3) | 136.33(6)  |
| C15                                                                                                                                                        | H15  | O3 <sup>2</sup> | 0.9300   | 2.837(3)  | 3.634(3) | 144.42(6)  |
| C16                                                                                                                                                        | H16  | O1 <sup>4</sup> | 0.9300   | 2.849(3)  | 3.678(3) | 149.08(6)  |
| C20                                                                                                                                                        | H20  | O2 <sup>1</sup> | 0.9300   | 3.018(3)  | 3.793(3) | 141.83(6)  |
| C33                                                                                                                                                        | H33c | S1 <sup>5</sup> | 0.9600   | 3.306(13) | 3.943(2) | 125.6(11)  |
| C33                                                                                                                                                        | H33c | O2 <sup>5</sup> | 0.9600   | 2.895(5)  | 3.711(3) | 143.5(6)   |
| C32                                                                                                                                                        | H32b | O2 <sup>1</sup> | 0.9600   | 2.735(12) | 3.577(3) | 146.7(17)  |
| Symmetry codes: <sup>1</sup> 3/2-X,1/2+Y,1/2-Z; <sup>2</sup> 1-X,1-Y,1-Z; <sup>3</sup> 1-X,-Y,1-Z; <sup>4</sup> +X,1+Y,+Z; <sup>5</sup> 1/2-X,1/2+Y,1/2-Z. |      |                 |          |           |          |            |
| <b>PD2</b>                                                                                                                                                 |      |                 |          |           |          |            |
| C11                                                                                                                                                        | H11  | O2 <sup>1</sup> | 0.9300   | 2.922(2)  | 3.843(2) | 170.71(5)  |
| C2                                                                                                                                                         | H2   | O2 <sup>1</sup> | 0.9300   | 2.846(2)  | 3.765(2) | 170.15(5)  |
| C19                                                                                                                                                        | H19  | O3 <sup>2</sup> | 0.9300   | 3.066(3)  | 3.925(3) | 154.30(5)  |
| C14                                                                                                                                                        | H14  | O2 <sup>1</sup> | 0.9300   | 3.171(3)  | 3.844(3) | 130.82(5)  |
| C21                                                                                                                                                        | H21  | O3 <sup>2</sup> | 0.9300   | 3.022(3)  | 3.886(3) | 155.11(5)  |
| C22                                                                                                                                                        | H22  | O2 <sup>3</sup> | 0.9300   | 2.679(3)  | 3.565(3) | 159.57(6)  |
| Symmetry codes: <sup>1</sup> -1+X,+Y,+Z; <sup>2</sup> -1+X,+Y,-1+Z; <sup>3</sup> 1-X,-Y,-Z.                                                                |      |                 |          |           |          |            |
| <b>PD3</b>                                                                                                                                                 |      |                 |          |           |          |            |
| C36                                                                                                                                                        | H36  | O3              | 0.9300   | 2.330(4)  | 2.996(4) | 128.29(8)  |
| C7                                                                                                                                                         | H7   | O2 <sup>1</sup> | 0.9300   | 2.517(3)  | 3.320(3) | 144.73(8)  |
| C7                                                                                                                                                         | H7   | O3 <sup>1</sup> | 0.9300   | 3.364(3)  | 3.978(3) | 125.57(6)  |
| C6                                                                                                                                                         | H6   | O3 <sup>1</sup> | 0.9300   | 3.214(4)  | 3.906(4) | 132.80(7)  |
| C38                                                                                                                                                        | H38b | O1 <sup>2</sup> | 0.9600   | 2.928(18) | 3.681(4) | 136.2(19)  |
| C38                                                                                                                                                        | H38c | N1 <sup>2</sup> | 0.9600   | 3.01(2)   | 3.732(4) | 133(2)     |
| C16                                                                                                                                                        | H16  | O3 <sup>3</sup> | 0.9300   | 2.543(4)  | 3.466(4) | 171.77(10) |
| C3                                                                                                                                                         | H3   | N2 <sup>4</sup> | 0.9300   | 2.744(4)  | 3.667(4) | 171.72(9)  |
| Symmetry codes: <sup>1</sup> 2-X,2-Y,1-Z; <sup>2</sup> -1+X,+Y,+Z; <sup>3</sup> 1-X,1-Y,2-Z; <sup>4</sup> 1-X,1-Y,1-Z.                                     |      |                 |          |           |          |            |

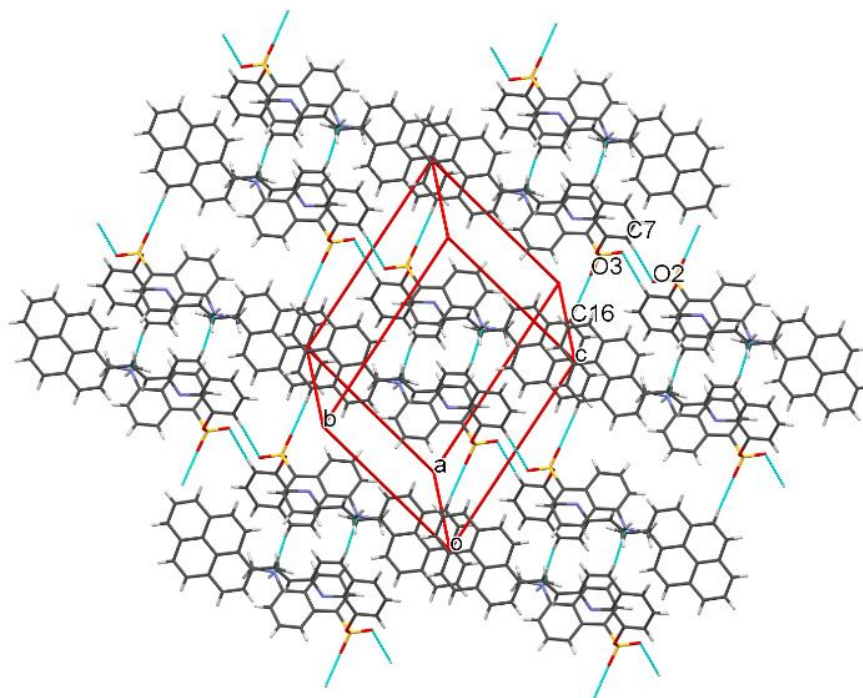

**Fig. S20** The extension of 1D chains into 2D sheets through  $\pi$ - $\pi$  stacking and C-H $\cdots$ O interactions in PD3. The short contacts are shown in turquoise color.

### **Analysis of Supramolecular $\pi$ -Stacking and C-H $\cdots$ $\pi$ Interactions in PD series Compounds.**

The ‘Analysis of short ring interactions’ obtained using the CALC ALL option of PLATON<sup>[7,8]</sup> were used. Out of the several such interactions listed, only the strong interactions characterized by short centroid-centroid contacts ( $< 3.8 \text{ \AA}$ ), near parallel ring planes ( $\alpha < 10^\circ$  to  $\sim 0^\circ$ ), small slip angles ( $\beta, \gamma < 25^\circ$ ) and vertical displacements (slippage  $< 1.5 \text{ \AA}$ ), which denote sizable overlap of the aryl plane areas, were considered.<sup>[9,10]</sup>

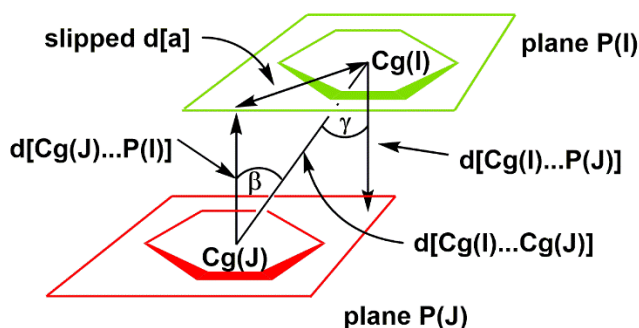

**Scheme S3.** Graphical presentation of the parameters used for the description of  $\pi$ - $\pi$  stacking interactions in the present study.

- Cg(I) = Ring Center-of-Gravity (Plane number I)
- $\alpha$  = Dihedral Angle between Planes I and J ( $^\circ$ )
- $\beta$  = Angle Cg(I) $\rightarrow$ Cg(J) vector and normal to plane I ( $^\circ$ )
- $\gamma$  = Angle Cg(I) $\rightarrow$ Cg(J) vector and normal to plane J ( $^\circ$ )
- d[Cg(I) $\cdots$ Cg(J)] = Distance between ring Centroids ( $\text{\AA}$ )
- d[Cg(I)  $\cdots$ P(J)] = Perpendicular distance of Cg(I) on ring J ( $\text{\AA}$ )
- d[Cg(J)  $\cdots$ P(I)] = Perpendicular distance of Cg(J) on ring I ( $\text{\AA}$ )
- Slippage d[a] = Distance between Cg(I) and Perpendicular Projection of Cg(J) on Ring I ( $\text{\AA}$ ).

**Table S5** Analyses of possible  $\pi$ - $\pi$  interactions in PD2 and PD3.

| Cg(I)                                                                                                                                                                | Cg(J) | [ARU(J)] | d[Cg-Cg]<br>( $\text{\AA}$ ) | $\alpha$ (o) | $\beta$ (o) | $\gamma$ (o) | d[Cg(I) $\cdots$ P(J)]<br>$\text{\AA}$ | d[Cg(J) $\cdots$ P(I)]<br>$\text{\AA}$ | Slippage<br>d[a] ( $\text{\AA}$ ) |
|----------------------------------------------------------------------------------------------------------------------------------------------------------------------|-------|----------|------------------------------|--------------|-------------|--------------|----------------------------------------|----------------------------------------|-----------------------------------|
| <b>PD2</b>                                                                                                                                                           |       |          |                              |              |             |              |                                        |                                        |                                   |
| Cg5[1]                                                                                                                                                               | Cg5   | 2555.01  | 3.8296(3)                    | 0            | 28.4        | 28.4         | 3.3687                                 | 3.3687                                 | 1.821                             |
| Cg5[1]                                                                                                                                                               | Cg10  | 2555.01  | 3.6900(2)                    | 1            | 25.2        | 24.7         | 3.3531                                 | 3.3399                                 | 1.569                             |
| Cg10[1]                                                                                                                                                              | Cg5   | 2555.01  | 3.6900(2)                    | 1            | 24.7        | 25.2         | 3.3399                                 | 3.3531                                 | 1.540                             |
| Where, CgX = Ring Center-of-Gravity of ring X. Ring 5 = C20-C21-C22-C23-C24-C25; Ring 10 = C12-C13-C18-C19-C20-C21-C22-C23-C24-C25; see Figure 7 of main manuscript. |       |          |                              |              |             |              |                                        |                                        |                                   |
| <b>PD3</b>                                                                                                                                                           |       |          |                              |              |             |              |                                        |                                        |                                   |
| Cg4[1]                                                                                                                                                               | Cg4   | 2675.01  | 3.8544(3)                    | 0            | 26.9        | 26.9         | 3.4359                                 | 3.4359                                 | 1.747                             |
| Cg4[1]                                                                                                                                                               | Cg5   | 2775.01  | 3.9059(3)                    | 1            | 27.8        | 27.7         | 3.4589                                 | 3.4560                                 | 1.820                             |
| Cg4[1]                                                                                                                                                               | Cg10  | 2675.01  | 3.8841(3)                    | 0            | 28.1        | 27.9         | 3.4319                                 | 3.4250                                 | 1.832                             |
| Cg5[1]                                                                                                                                                               | Cg4   | 2775.01  | 3.9059(3)                    | 1            | 27.7        | 27.8         | 3.4560                                 | 3.4589                                 | 1.814                             |
| Cg10[1]                                                                                                                                                              | Cg4   | 2675.01  | 3.8841(3)                    | 0            | 27.9        | 28.1         | 3.4250                                 | 3.4319                                 | 1.819                             |

|                                                                                                                                                                                                                                                            |      |         |           |   |      |      |        |        |       |
|------------------------------------------------------------------------------------------------------------------------------------------------------------------------------------------------------------------------------------------------------------|------|---------|-----------|---|------|------|--------|--------|-------|
| Cg12[1]                                                                                                                                                                                                                                                    | Cg12 | 2775.01 | 3.9047(3) | 0 | 27.7 | 27.7 | 3.4574 | 3.4574 | 1.815 |
| Where, CgX = Ring Center-of-Gravity of ring X. Ring 4 = C15-C16-C17-C18-C27-C26; Ring 5 = C18-C19-C20-C21-C22-C27; Ring 10 = C12-C13-C14-C15-C16-C17-C18-C27-C26-C25; Ring 12 = C15-C16-C17-C18-C19-C20-C21-C22-C27-C26; see Figure 10 of main manuscript. |      |         |           |   |      |      |        |        |       |

**Table S6.** Analyses for possible C–H··· $\pi$  interactions in and PD1-PD3.

| X–H(I)                                                                                                                                                                                                                                      | Cg(J) | [ARU(J)] | H···Cg | H-Perp | Gamma | X–H···Cg | X···Cg    | X–H, $\pi$ |
|---------------------------------------------------------------------------------------------------------------------------------------------------------------------------------------------------------------------------------------------|-------|----------|--------|--------|-------|----------|-----------|------------|
| <b>PD1</b>                                                                                                                                                                                                                                  |       |          |        |        |       |          |           |            |
| C19-H19[1]                                                                                                                                                                                                                                  | Cg6   | 2655.01  | 2.66   | -2.65  | 4.57  | 144      | 3.4562(1) | 55         |
| Where, Cg6 = Ring Center-of-Gravity of ring 6. Ring 6 = C26-C27-C28-C29-C30-C31; see Figure 5 of main manuscript.                                                                                                                           |       |          |        |        |       |          |           |            |
| <b>PD2</b>                                                                                                                                                                                                                                  |       |          |        |        |       |          |           |            |
| C10-H10[1]                                                                                                                                                                                                                                  | Cg7   | 1555.01  | 2.82   | -2.77  | 10.71 | 155      | 3.6815(2) | 76         |
| C15-H15[1]                                                                                                                                                                                                                                  | Cg6   | 1455.01  | 2.81   | 2.76   | 10.75 | 125      | 3.4339(2) | 43         |
| C37-H37A[1]                                                                                                                                                                                                                                 | Cg9   | 1555.01  | 2.99   | 2.88   | 15.15 | 171      | 3.9374(3) | 81         |
| [1555] = X,Y,Z; [1455] = -1+X,Y,Z.<br>Where, CgX = Ring Center-of-Gravity of ring X. Ring 6 = C26-C27-C28-C29-C30-C35; Ring 7 = C30-C31-C32-C33-C34-C35; Ring 9 = C12-C13-C14-C15-C16-C17-C18-C19-C20-C25; see Figure 7 of main manuscript. |       |          |        |        |       |          |           |            |
| <b>PD3</b>                                                                                                                                                                                                                                  |       |          |        |        |       |          |           |            |
| C10-H10[1]                                                                                                                                                                                                                                  | Cg8   | 1555.01  | 2.88   | 2.87   | 5.10  | 142      | 3.6530(3) | 54         |
| C21-H21[1]                                                                                                                                                                                                                                  | Cg7   | 1565.01  | 2.96   | -2.95  | 3.79  | 122      | 3.5387(3) | 29         |
| [1555] = X,Y,Z; [1565] = X,1+Y,Z.<br>Where, CgX = Ring Center-of-Gravity of ring X. Ring 7 = C28-C29-C30-C31-C32-C37; Ring 8 = C32-C33-C34-C35-C36-C37; see Figure 10 of main manuscript.                                                   |       |          |        |        |       |          |           |            |

## Cytotoxicity Study of PD1-PD3.

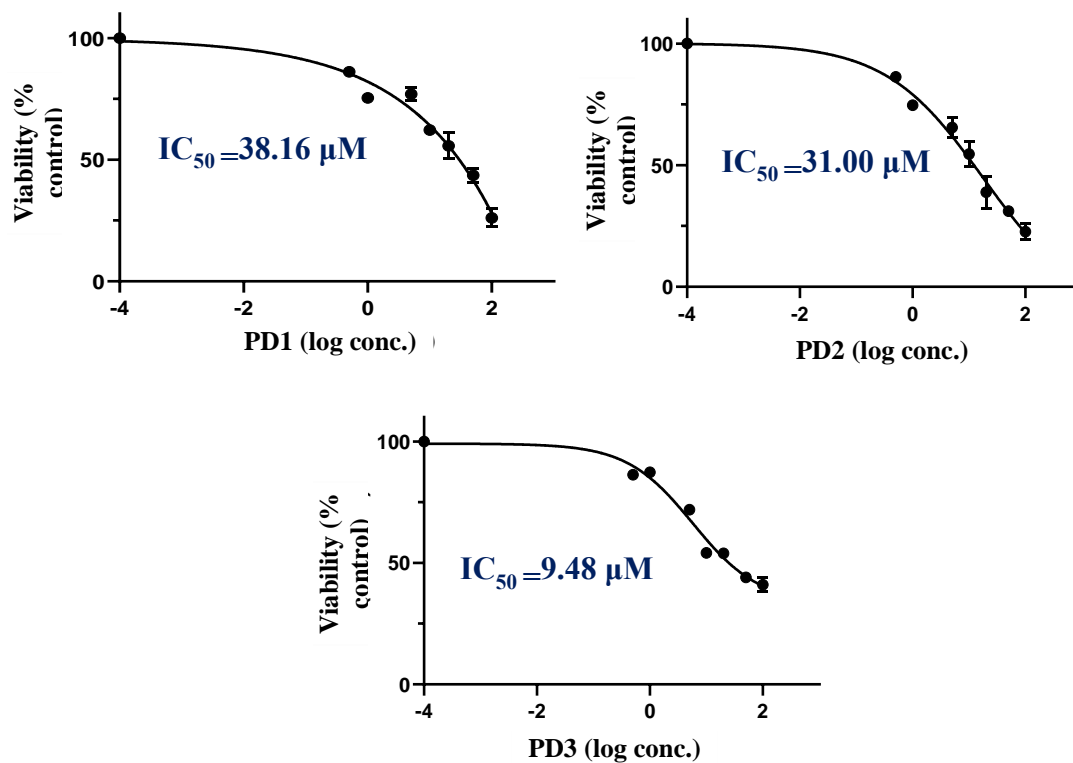

Fig. S21 Growth inhibitory response of PD1-PD3.

**Table S7** A comparison of the cytotoxic activities of PH and PD series compounds with similar styryl quinoline and sulfonate derivatives reported in the literature.

| Structure                                                                           | Cell Line; $IC_{50}$       | References |
|-------------------------------------------------------------------------------------|----------------------------|------------|
| 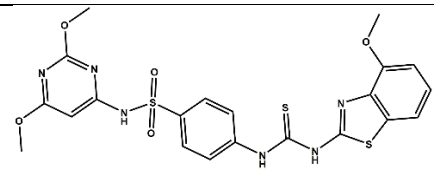 | MCF-7; 47.6 ( $\mu g/ml$ ) | 11         |
|  | HepG2; 46.2 ( $\mu M$ )    | 12         |



|                                                                                                                                                             |                                      |                         |
|-------------------------------------------------------------------------------------------------------------------------------------------------------------|--------------------------------------|-------------------------|
| 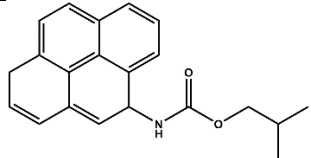                                                                           | HepG2; 31.8 ( $\mu\text{M}$ )        | 13                      |
|                                                                            | HepG2; 39.6 ( $\mu\text{M}$ )        |                         |
|                                                                            | HeLa; 11.9 ( $\mu\text{M}$ )         | 14                      |
|                                                                            | HCT 116; 9.8 ( $\mu\text{M}$ )       | 15                      |
|                                                                            | HeLa; 2.5 ( $\mu\text{M}$ )          | 16                      |
|                                                                           | HeLa; 2.9 ( $\mu\text{M}$ )          | 16                      |
|  <p>PH1: R = naphthalene<br/>PH2: R = anthracene<br/>PH3: R = pyrene</p> | PH1<br>HepG2; 8.2 ( $\mu\text{M}$ )  | <b>Current<br/>Work</b> |
|                                                                                                                                                             | PH2<br>HepG2; 11.7 ( $\mu\text{M}$ ) |                         |
|                                                                                                                                                             | PH3<br>HepG2; 8.0 ( $\mu\text{M}$ )  |                         |
|  <p>PD1: R = naphthalene<br/>PD2: R = anthracene<br/>PD3: R = pyrene</p> | PD1<br>HepG2; 38.2 ( $\mu\text{M}$ ) |                         |
|                                                                                                                                                             | PD2<br>HepG2; 31.0 ( $\mu\text{M}$ ) |                         |
|                                                                                                                                                             | PD3<br>HepG2; 9.5 ( $\mu\text{M}$ )  |                         |

## References

1. CrysAlisPro Program, version 171.37.33c, Agilent Technologies, Oxford, UK, **2012**.
  2. G. M. Sheldrick, *Acta Crystallogr.* 2008, **64**, 112-122.
  3. O. V. Dolomanov, L. J. Bourhis, R. J. Gildea, J. A. K. Howard and H. Puschmann, *J. Appl. Crystallogr.* 2009, **42**, 339-341.
  4. S. Sehlangia, M. Devi, N. Nayak, N. Garg, A. Dhir and C. P. Pradeep, *ChemistrySelect*, 2020, **5**, 5429-5436.
  5. L. Praveen, M. L. P. Reddy and R. L. Varma, *Tetrahedron Lett.*, 2010, **51**, 6626-6629.
  6. C. Heering, B. Nateghi and C. Janiak, *Crystals*, 2016, **6**, 22.
  7. A. L. Spek, *Acta Crystallogr.* 2009, **65**, 148-155.
  8. A. L. Spek, PLATON—A Multipurpose Crystallographic Tool; Utrecht University: Utrecht, The Netherlands, 2005.
  9. C. Janiak, *J. Chem. Soc. Dalton Trans.* 2000, DOI: 10.1039/B003010O, 3885-3896.
  10. A. Tahli, Ü. Köc, R. F. M. Elshaarawy, A. C. Kautz and C. Janiak, *Crystals*, 2016, **6**.
  11. M. M. Ghorab, M. S. Alsaid, M. S. A. El-Gaby, N. A. Safwat, M. M. Elaasser and A. M. Soliman, *Eur. J. Med. Chem.*, 2016, **124**, 299-310.
  12. D. Kanabar, P. Farrales, M. Gnanamony, J. Almasri, E. M. Abo-Ali, Y. Otmankel, H. Shah, D. Nguyen, M. El Menyewi, V. V. Dukhande, A. D'Souza and A. Muth, *Bioorg. Med. Chem. Lett.*, 2020, **30**, 126889.
  13. D. Bandyopadhyay, J. C. Granados, J. D. Short and B. K. Banik, *Oncol. Lett.*, 2012, **3**, 45-49.
  14. A. Barilli, C. Atzeri, I. Bassanetti, F. Ingoglia, V. Dall'Asta, O. Bussolati, M. Maffini, C. Mucchino and L. Marchiò, *Mol. Pharm.*, 2014, **11**, 1151-1163.
  15. A. Mrozek-Wilczkiewicz, E. Spaczynska, K. Malarz, W. Cieslik, M. Rams-Baron, V. Kryštof and R. Musiol, *PLoS one*, 2015, **10**, e0142678.
  16. S. Sehlangia, N. Nayak, N. Garg and C. P. Pradeep, *ACS Omega*, 2022, **7**, 24838-24850.
-
